# Supplementary material for: Decreased Fatty Acid Oxidation Gene Expression in Pre-Eclampsia According to the Onset and Presence of Intrauterine Growth Restriction
Source: MDPI journal article supplement (doi:10.3390/nu15183877), 2023-09-06
Supplement: s1 [file s1]

## Article

# Decreased Fatty Acid Oxidation Gene Expression in Preeclampsia according to the Onset and the Presence of Intrauterine Growth Restriction

Alejandra Abascal-Saiz <sup>1,†</sup>, Eva Fuente-Luelmo <sup>2,†</sup>, María Haro <sup>2</sup>, Victoria Fioravanti <sup>3</sup>, Eugenia Antolín <sup>1</sup>, María P. Ramos-Álvarez <sup>2</sup>, and José L. Bartha <sup>1,\*</sup>

## SUPPLEMENTARY FILES

Supplementary Table S1: qPCR primers and conditions.

|               | Product length (pb) | Primer Forward / Primer Reverse                   | Annealing temperature | Efficiency (%) | R <sup>2</sup> | Slope  | Intercept |
|---------------|---------------------|---------------------------------------------------|-----------------------|----------------|----------------|--------|-----------|
| GAPDH         | 87                  | TGCACCACCACTGCTTAGC / GGCATGGACTGTGGTCATGAG       | 61                    | 97.6           | 0.999          | -3.381 | 25.18     |
| LCHAD (HADHA) | 195                 | ATCAAATCAGAAGTGCCGTCCT / CTCCCAGGCAGGATCCATTG     | 62                    | 96.1           | 0.988          | -3.418 | 47.426    |
| MCAD (ACADM)  | 146                 | ACCAAGTATGCCCTGGAAAGG / CGACCAGAATCAACCTCCCAA     | 62                    | 99.8           | 0.986          | -3.327 | 49.383    |
| RPL30         | 149                 | AAAGCTGGGCAGTTGTTAGC / AAGACGAAAAAGTCGCTGGA       | 60                    | 91.2           | 0.991          | -3.553 | 42.151    |
| CPT1A         | 288                 | TTCAGTTCACGGTCACTCCG / TGACCACGTTCTTCGCTCGG       | 61                    | 93.9           | 0.953          | -3.477 | 51.124    |
| CPT2          | 129                 | TTGAAGACACCATTAGGAGATACC / CCAGCTGCTCATGCAGTTCTTT | 60                    | 91.1           | 0.991          | -3.555 | 51.064    |

Key: qPCR: quantitative PCR, GAPDH: Glyceraldehyde-3-phosphate dehydrogenase, LCHAD: long-chain 3-hydroxyacyl-CoA dehydrogenase, HADHA: Hydroxyacyl-CoA dehydrogenase trifunctional multienzyme complex subunit alpha. MCAD / ACADM: Medium-chain acyl-CoA dehydrogenase, RPL30: Ribosomal protein L30, CPT: Carnitine palmitoyltransferase.

Supplementary Table S2: Relative LCHAD mRNA expression (a.u.)

| LCHAD              |                                |                                      |                                |               |                                      |                                |               |                                      |                                |                              |
|--------------------|--------------------------------|--------------------------------------|--------------------------------|---------------|--------------------------------------|--------------------------------|---------------|--------------------------------------|--------------------------------|------------------------------|
|                    | Comparison of different groups |                                      |                                |               |                                      |                                |               |                                      |                                | Comparison of placenta sides |
|                    | Global                         |                                      |                                | Maternal side |                                      |                                | Fetal side    |                                      |                                |                              |
|                    |                                | <i>p</i> value: control vs. subgroup | <i>p</i> value: intra subgroup |               | <i>p</i> value: control vs. subgroup | <i>p</i> value: intra subgroup |               | <i>p</i> value: control vs. subgroup | <i>p</i> value: intra subgroup | <i>p</i> value               |
| Control, n=28      | 1.003 (0.383)                  | -                                    | -                              | 0.908 (0.598) | -                                    | -                              | 1.067 (0.584) | -                                    | -                              | 0.733                        |
| Preeclampsia, n=28 | 0.635 (0.276)                  | 1.1 ×10 <sup>-5</sup> *              | -                              | 0.636 (0.532) | 5.6 ×10 <sup>-4</sup> *              | -                              | 0.608 (0.250) | 5.5 ×10 <sup>-4</sup> *              | -                              | 0.677                        |
| EOPE, n=14         | 0.625 (0.263)                  | 3.3 ×10 <sup>-4</sup> *              | 0.575                          | 0.635 (0.440) | 0.005*                               | 0.512                          | 0.583 (0.252) | 0.019*                               | 0.924                          | 0.534                        |
| LOPE, n=14         | 0.655 (0.318)                  | 0.003*                               |                                | 0.681 (0.766) | 0.04*                                |                                | 0.633 (0.334) | 0.013*                               |                                | 0.925                        |
| SPE, n=14          | 0.635 (0.271)                  | 0.001*                               | 0.822                          | 0.721 (0.497) | 0.017*                               | 0.987                          | 0.648 (0.242) | 0.018*                               | 0.998                          | 0.272                        |
| MPE, n=14          | 0.635 (0.319)                  | 0.001*                               |                                | 0.574 (0.684) | 0.013*                               |                                | 0.608 (0.419) | 0.014*                               |                                | 0.650                        |
| IUGR, n=10         | 0.635 (0.263)                  | 0.001*                               | 0.813                          | 0.636 (0.608) | 0.017*                               | 0.726                          | 0.583 (0.227) | 0.028*                               | 0.868                          | 0.678                        |
| NIUGR, n=17        | 0.635 (0.322)                  | 0.001*                               |                                | 0.681 (0.514) | 0.013*                               |                                | 0.681 (0.297) | 0.009*                               |                                | 0.959                        |

Key: a.u.: arbitrary units, LCHAD: long-chain 3-hydroxyacyl-CoA dehydrogenase, EOPE: early-onset preeclampsia, LOPE: late-onset preeclampsia, SPE: severe preeclampsia, MPE: mild preeclampsia, IUGR: intrauterine growth restriction, NIUGR: Not intrauterine growth restriction. The results are expressed as the median and interquartile range (in brackets). \*There were significant differences among the groups ( $p < 0.05$ ).

**Supplementary Table S3:** Relative MCAD mRNA expression (a.u.)

| MCAD               |                                |                                      |                                |               |                                      |                                |               |                                      |                                |                              |
|--------------------|--------------------------------|--------------------------------------|--------------------------------|---------------|--------------------------------------|--------------------------------|---------------|--------------------------------------|--------------------------------|------------------------------|
|                    | Comparison of different groups |                                      |                                |               |                                      |                                |               |                                      |                                | Comparison of placenta sides |
|                    | Global                         |                                      |                                | Maternal side |                                      |                                | Fetal side    |                                      |                                |                              |
|                    |                                | <i>p</i> value: control vs. subgroup | <i>p</i> value: intra subgroup |               | <i>p</i> value: control vs. subgroup | <i>p</i> value: intra subgroup |               | <i>p</i> value: control vs. subgroup | <i>p</i> value: intra subgroup | <i>p</i> value               |
| Control, n=28      | 1.020 ± 0.210                  | -                                    | -                              | 1.001 ± 0.235 | -                                    | -                              | 1.058 ± 0.286 | -                                    | -                              | 0.361                        |
| Preeclampsia, n=28 | 0.755 ± 0.247                  | 7.67 ×10 <sup>-5</sup> *             | -                              | 0.796 ± 0.334 | 0.011*                               | -                              | 0.719 ± 0.193 | 8 ×10 <sup>-6</sup> *                | -                              | 0.172                        |
| EOPE, n=14         | 0.708 ± 0.325                  | 4.9 ×10 <sup>-4</sup> *              | 0.571                          | 0.734 ± 0.409 | 0.021*                               | 0.537                          | 0.669 ± 0.233 | 1.6 ×10 <sup>-4</sup> *              | 0.641                          | 0.512                        |
| LOPE, n=14         | 0.798 ± 0.143                  | 0.013*                               |                                | 0.852 ± 0.247 | 0.265                                |                                | 0.759 ± 0.152 | 0.02*                                |                                | 0.244                        |
| SPE, n=14          | 0.685 ± 0.286                  | 1.6 ×10 <sup>-4</sup> *              | 0.284                          | 0.754 ± 0.398 | 0.037*                               | 0.753                          | 0.650 ± 0.217 | 4.1 ×10 <sup>-5</sup> *              | 0.374                          | 0.151                        |
| MPE, n=14          | 0.819 ± 0.194                  | 0.024*                               |                                | 0.834 ± 0.270 | 0.193                                |                                | 0.783 ± 0.150 | 0.004*                               |                                | 0.709                        |
| IUGR, n=10         | 0.744 ± 0.344                  | 0.004*                               | 0.979                          | 0.780 ± 0.464 | 0.155                                | 0.998                          | 0.659 ± 0.269 | 3.1 ×10 <sup>-4</sup> *              | 0.634                          | 0.371                        |
| NIUGR, n=17        | 0.762 ± 0.165                  | 0.002*                               |                                | 0.793 ± 0.245 | 0.061                                |                                | 0.753 ± 0.133 | 1 ×10 <sup>-4</sup> *                |                                | 0.334                        |

Key: a.u.: arbitrary units, MCAD: medium-chain acyl-CoA dehydrogenase, EOPE: early-onset preeclampsia, LOPE: late-onset preeclampsia, SPE: severe preeclampsia, MPE: mild preeclampsia, IUGR: intrauterine growth restriction, NIUGR: Not intrauterine growth restriction. The results are expressed as the mean ± standard deviation. \*There were significant differences among the groups ( $p < 0.05$ ).

**Supplementary Table S4:** Relative CPT1A mRNA expression (a.u.)

| CPT1A              |                                |                                      |                               |               |                                      |                               |               |                                      |                               |                              |
|--------------------|--------------------------------|--------------------------------------|-------------------------------|---------------|--------------------------------------|-------------------------------|---------------|--------------------------------------|-------------------------------|------------------------------|
|                    | Comparison of different groups |                                      |                               |               |                                      |                               |               |                                      |                               | Comparison of placenta sides |
|                    | Global                         |                                      |                               | Maternal side |                                      |                               | Fetal side    |                                      |                               |                              |
|                    |                                | <i>p</i> value: control vs. subgroup | <i>p</i> value: intrasubgroup |               | <i>p</i> value: control vs. subgroup | <i>p</i> value: intrasubgroup |               | <i>p</i> value: control vs. subgroup | <i>p</i> value: intrasubgroup | <i>p</i> value               |
| Control, n=28      | 1.330 ± 0.760                  | -                                    | -                             | 1.346 ± 0.643 | -                                    | -                             | 1.251 ± 0.722 | -                                    |                               | 0.526                        |
| Preeclampsia, n=28 | 1.379 ± 0.798                  | 0.818                                | -                             | 1.382 ± 0.823 | 0.859                                | -                             | 1.293 ± 0.615 | 0.822                                | -                             | 0.623                        |
| EOPE, n=14         | 1.629 ± 0.617                  | 0.482                                | 0.241                         | 1.508 ± 0.700 | 0.793                                | 0.672                         | 1.475 ± 0.517 | 0.619                                | 0.456                         | 0.884                        |
| LOPE, n=14         | 1.147 ± 0.895                  | 0.476                                |                               | 1.265 ± 0.934 | 0.940                                |                               | 1.150 ± 0.665 | 0.889                                |                               | 0.353                        |
| SPE, n=14          | 1.496 ± 0.751                  | 0.804                                | 0.735                         | 1.551 ± 0.734 | 0.687                                | 0.488                         | 1.411 ± 0.702 | 0.772                                | 0.680                         | 0.582                        |
| MPE, n=14          | 1.270 ± 0.852                  | 0.970                                |                               | 1.225 ± 0.896 | 0.870                                |                               | 1.184 ± 0.527 | 0.953                                |                               | 0.528                        |
| IUGR, n=10         | 1.197 ± 0.694                  | 0.880                                | 0.575                         | 1.290 ± 0.744 | 0.975                                | 0.856                         | 1.217 ± 0.600 | 0.990                                | 0.892                         | 0.997                        |
| NIUGR, n=17        | 1.504 ± 0.861                  | 0.757                                |                               | 1.445 ± 0.892 | 0.906                                |                               | 1.343 ± 0.640 | 0.905                                |                               | 0.306                        |

Key: a.u.: arbitrary units, CPT: carnitine palmitoyltransferase, EOPE: early-onset preeclampsia, LOPE: late-onset preeclampsia, SPE: severe preeclampsia, MPE: mild preeclampsia, IUGR: intrauterine growth restriction, NIUGR: Not intrauterine growth restriction. The results are expressed as the mean ± standard deviation. \*There were significant differences among the groups ( $p < 0.05$ ).

**Supplementary Table S5:** Relative CPT2 mRNA expression (a.u.)

| CPT2               |                                |                               |                        |               |                               |                        |               |                               |                        |                              |
|--------------------|--------------------------------|-------------------------------|------------------------|---------------|-------------------------------|------------------------|---------------|-------------------------------|------------------------|------------------------------|
|                    | Comparison of different groups |                               |                        |               |                               |                        |               |                               |                        | Comparison of placenta sides |
|                    | Global                         |                               |                        | Maternal side |                               |                        | Fetal side    |                               |                        | p value                      |
|                    |                                | p value: control vs. subgroup | p value: intrasubgroup |               | p value: control vs. subgroup | p value: intrasubgroup |               | p value: control vs. subgroup | p value: intrasubgroup |                              |
| Control, n=28      | 1.028 ± 0.247                  | -                             | -                      | 1.051 ± 0.354 | -                             | -                      | 1.175 ± 0.332 | -                             | -                      | 0.139                        |
| Preeclampsia, n=28 | 0.745 ± 0.250                  | 1.1 × 10 <sup>-4</sup> *      |                        | 0.782 ± 0.335 | 0.006*                        | -                      | 0.854 ± 0.301 | 5.7 × 10 <sup>-4</sup> *      | -                      | 0.391                        |
| EOPE, n=14         | 0.725 ± 0.166                  | 0.002*                        | 0.908                  | 0.753 ± 0.312 | 0.036*                        | 0.899                  | 0.841 ± 0.198 | 0.014*                        | 0.983                  | 0.456                        |
| LOPE, n=14         | 0.766 ± 0.319                  | 0.008*                        |                        | 0.813 ± 0.365 | 0.113                         |                        | 0.864 ± 0.370 | 0.013*                        |                        | 0.687                        |
| SPE, n=14          | 0.690 ± 0.172                  | 4.8 × 10 <sup>-4</sup> *      | 0.494                  | 0.687 ± 0.292 | 0.007*                        | 0.336                  | 0.849 ± 0.237 | 0.013*                        | 0.997                  | 0.205                        |
| MPE, n=14          | 0.801 ± 0.307                  | 0.023*                        |                        | 0.878 ± 0.359 | 0.297                         |                        | 0.858 ± 0.360 | 0.013*                        |                        | 0.801                        |
| IUGR, n=10         | 0.655 ± 0.247                  | 2.4 × 10 <sup>-4</sup> *      | 0.251                  | 0.652 ± 0.352 | 0.005*                        | 0.224                  | 0.803 ± 0.245 | 0.007*                        | 0.796                  | 0.271                        |
| NIUGR, n=17        | 0.812 ± 0.274                  | 0.021*                        |                        | 1.051 ± 0.354 | 0.259                         |                        | 0.888 ± 0.337 | 0.019*                        |                        | 0.880                        |

Key: a.u.: arbitrary units, CPT: carnitine palmitoyltransferase, EOPE: early-onset preeclampsia, LOPE: late-onset preeclampsia, SPE: severe preeclampsia, MPE: mild preeclampsia, IUGR: intrauterine growth restriction, NIUGR: Not intrauterine growth restriction. The results are expressed as the mean ± standard deviation. \*There were significant differences among the groups ( $p < 0.05$ ).
